# Supplementary material for: Development and Validation of a Robust Ferroptosis-Related Gene Panel for Breast Cancer Disease-Specific Survival
Source: Front Cell Dev Biol. 2021 Nov 25;9:709180. doi: 10.3389/fcell.2021.709180 (PMC8655913; doi:10.3389/fcell.2021.709180)
Supplement: Supplementary file 1 [file Table2.XLSX]

## Sheet: Sheet1
Characteristics	TCGA-BRCA			METABRIC-BRCA			GSE3494-BRCA
	High risk	Low risk	P value	High risk	Low risk	P value	High risk	Low risk	P value
number(%)	960			1900			234
	480(50)	480(50)		1252(65.9)	648(34.1)		70(30)	164(70)
Age (%)			0.003			<0.001			0.309
< 60y	283(29.5)	237 (24.7)		598 (31.5)	241(12.7)		31(13.2)	61(26.1)
≥60y	197(20.5)	243 (25.3)		654 (34.4)	407(21.4)		39(16.7)	103(44)
Race(%)			<0.001
White	289(30.1)	377(39.3)		-	-		-	-
Black	117(12.2)	51(5.3)		-	-		-	-
Asian and other	36(3.7)	16(1.7)		-	-		-	-
NA	38(4)	36(3.8)		-	-		-	-
Tumor grade(%)			-			<0.001			<0.001
G1	-	-		54(2.8)	110(5.8)		7(3)	55(23.5)
G2	-	-		370(19.5)	370(19.5)		28(12)	92(39.3)
G3	-	-		788(41.5)	137(7.2)		35(15)	15(6.4)
NA	-	-		40(2.1)	31(1.6)		-	2(0.9)
Histological type(%)			<0.001			<0.001
IDC	430(44.8)	274(28.5)		1028(54.1)	422(22.2)		-	-
ILC	28(2.9)	163(16.9)		64(3.4)	78(4.1)		-	-
Other	22(2.2)	43(4.5)		161(8.4)	148(7.8)		-	-
Menopause status(%)			0.723			<0.001
Pre	106	103		301(15.8)	110(5.8)		-	-
Post	302	314		951(50.1)	538(28.3)		-	-
Peri	18	19		-	-		-	-
NA	54	44		-	-		-	-
ER status(%)			<0.001			<0.001			<0.001
Positive	274(28.5)	442(46)		814(42.8)	643(33.8)		51(22.2)	149(93.1)
Negative	188(19.6)	15(1.6)		438(23.1)	5(0.3)		19(8.3)	11(4.8)
NA	18(1.9)	23(2.4)		-	-
PR status(%)			<0.001	-	-	<0.001			<0.001
Positive	224(23.3)	400(41.7)		496(26.1)	511(26.9)		40(17.1)	138(59)
Negative	239(24.9)	54(5.6)		756(39.8)	137(7.2)		30(12.8)	26(11.1)
NA	17(1.78)	26(2.7)		-	-		-	-
HER2 status(%)			<0.001	-	-	<0.001
Positive	114(11.9)	55(5.7)		227(11.9)	9(0.5)		-	-
Negative	306(31.9)	366(38.1)		1027(54.1)	640(33.7)		-	-
NA	63(6.6)	59(6.1)					-	-
Molecular subtype			<0.001			<0.001
HR+/Her2-	182(19)	353(60)		732(38.5)	646(33.4)		-	-
HR+/Her2+	77(16)	55(11.5)		96(7.7)	8(1.2)		-	-
HR-/Her2+	33(3.4)	0		131(6.9)	1(0.1)		-	-
TNBC	123(12.8)	12(1.3)		295(15.5)	4(1.3)		-	-
NA	65(6.8)	60(12.5)		-	-		-	-
TNM stage(%)			0.045			<0.001
0				3(0.2)	1(0.1)		-	-
I	67(7)	99(10.3)		263(13.8)	210(11.1)		-	-
II	279(29.1)	266(27.7)		560(29.5)	240(12.6)		-	-
III	113(11.8)	98(10.2)		98(5.2)	17(0.9)		-	-
IV	12(1.3)	6(0.6)		7(0.4)	2(0.1)		-	-
NA	9(0.9)	11(1.1)		321(16.9)	178(9.4)		-	-
Follow up state(%)
alive	428(44.6)	455(47.4)		776(40,8)	503(26.5)		48(20.5)	132(56.4)
dead	52(5.4)	25(2.6)		476(25.1)	145(7.6)		22(9.4)	32(13.7)
DSS years (median)	2.4	2.5		8.7	10.6		9.9	10.4
